# Supplementary material
Source: MDPI journal article supplement (https://www.mdpi.com/2313-0105/10/5/160)
Supplement: s1 [file s1]

# Supplementary

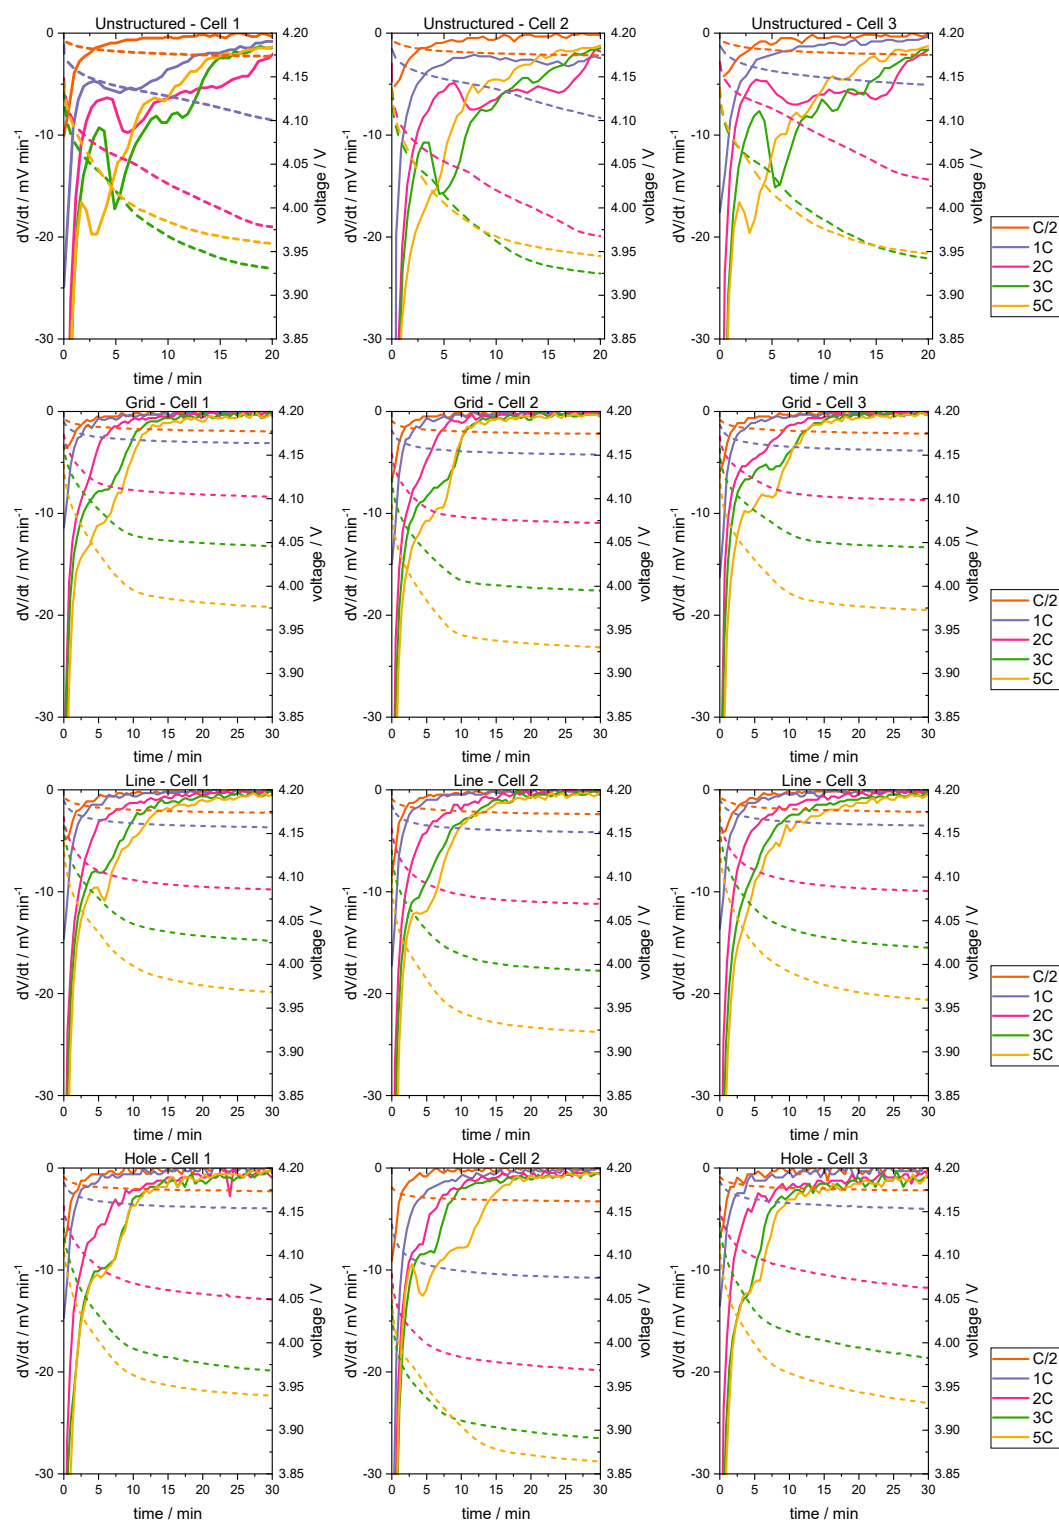

Figure S1. Differential voltage analysis of the voltage relaxation (solid line) and voltage as a function of time (dashed line) in the 4 h rest period after charging in the 5<sup>th</sup> cycle at each C-rate for all cells with unstructured and structured electrodes.

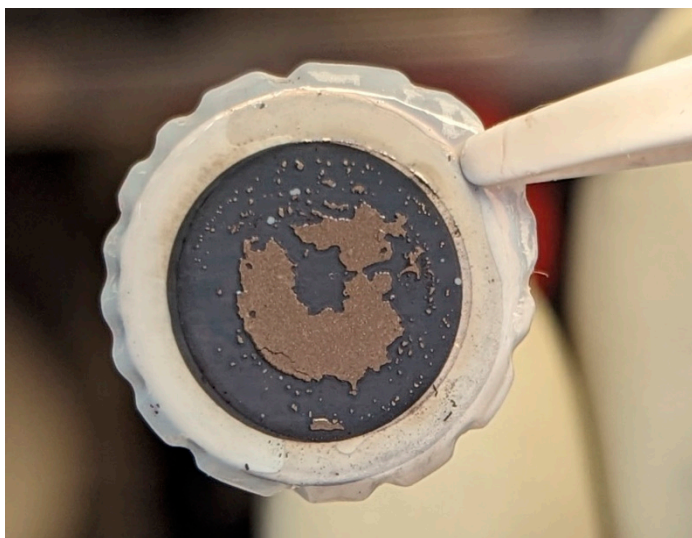

Figure S2. Separator of the cell with unstructured electrodes with plated lithium sticking on it (cathode visible on the backside)

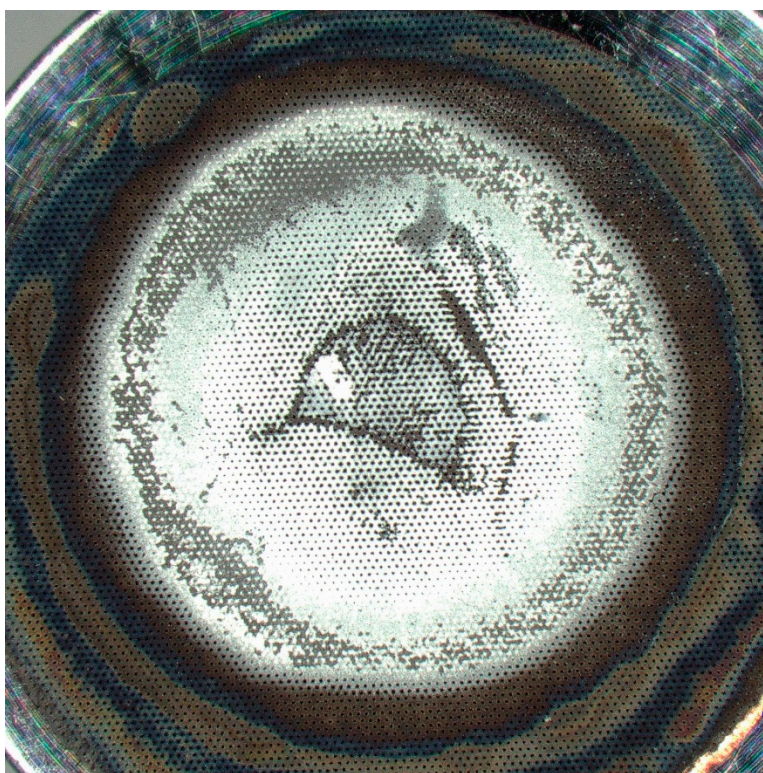

Figure S3. Post-mortem digital microscope image of the hole structured electrode with overgrown structures visible in the edge of the plated area.

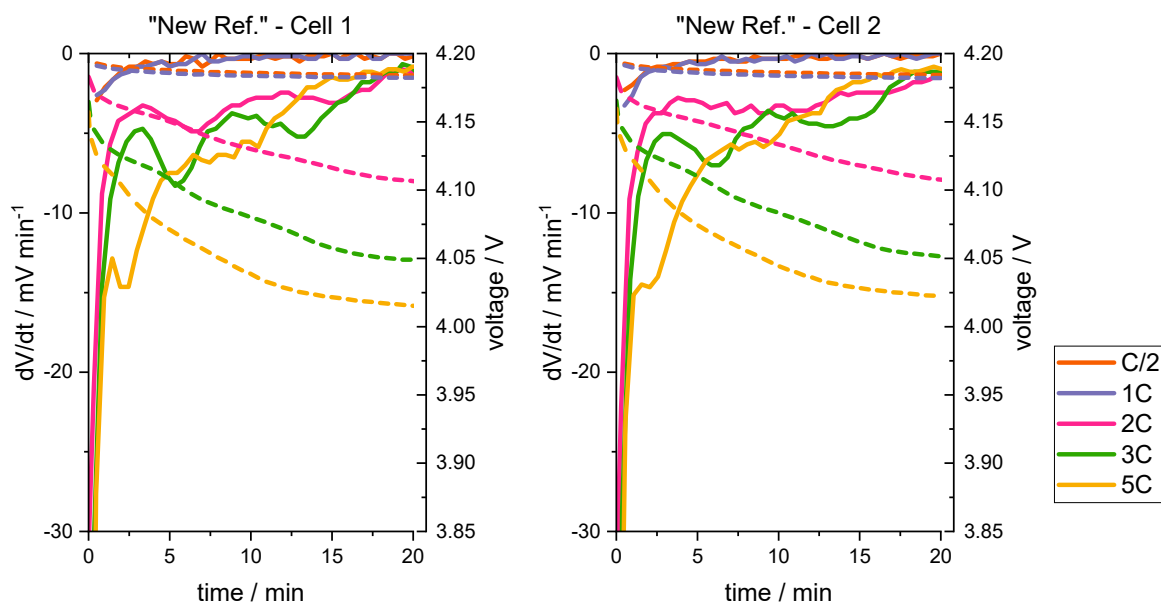

Figure S4. Differential voltage analysis of the voltage relaxation (solid line) and voltage as a function of time (dashed line) in the 4 h rest period after charging in the 5<sup>th</sup> cycle at each C-rate for the "New Ref." cells.

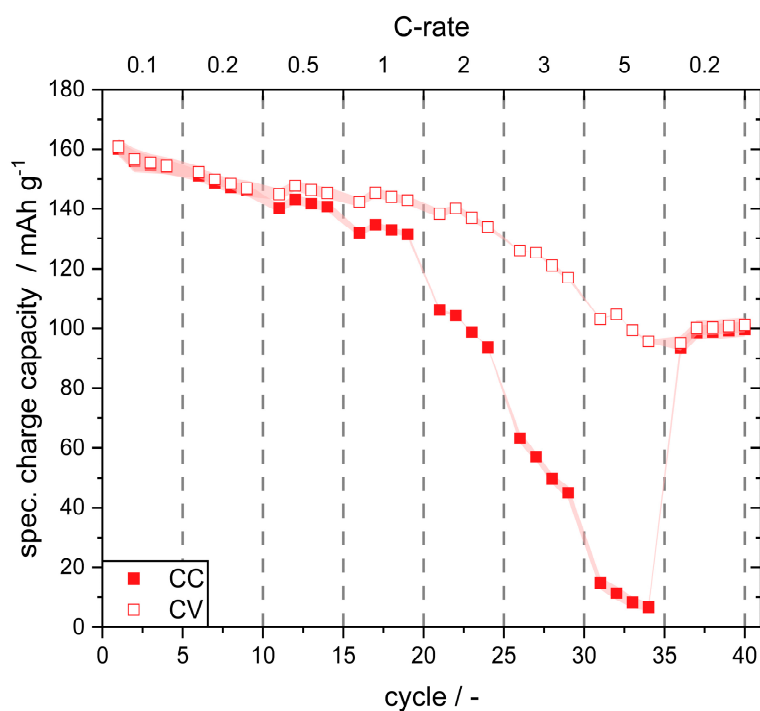

Figure S5. Specific charge capacity of the "New. Ref." cells after the CC and CCCV phase (without the 5<sup>th</sup> cycle at each C-rate). The shading represents the standard deviation.

Table S1. Abbreviations and data for calculating the energy density and specific energy.

|                                       |                                                              |                                  |
|---------------------------------------|--------------------------------------------------------------|----------------------------------|
| $A_A$ [m <sup>2</sup> ]               | Area anode                                                   | 0.049664 [52]                    |
| $A_C$ [m <sup>2</sup> ]               | Area cathode                                                 | 0.04845 [52]                     |
| $A_S$ [m <sup>2</sup> ]               | Area separator                                               | 0.0517 [52]                      |
| $B$ [-]                               | Balancing factor                                             | 1.14-1.17 (experiment)           |
| $d$ [m]                               | Coating thickness                                            | -                                |
| $d_A$ [m]                             | Anode coating thickness                                      | calculated; Equation (S3)        |
| $d_{Al}$ [m]                          | Cathode current collector thickness                          | 20e-6                            |
| $d_C$ [m]                             | Cathode coating thickness                                    | calculated; Equation (S5)        |
| $d_{Cu}$ [m]                          | Anode current collector thickness                            | 9e-6                             |
| $d_S$ [m]                             | Separator thickness                                          | 25e-6 (experiment)               |
| $d_{stack}$ [m]                       | Electrode stack thickness                                    | calculated; Equation (S9)        |
| $E_m$ [Wh kg <sup>-1</sup> ]          | Specific energy                                              | calculated; Equation (S18)       |
| $E_V$ [Wh m <sup>-3</sup> ]           | Energy density                                               | calculated; Equation (S17)       |
| $F_E$ [-]                             | Electrolyte factor                                           | 2 [31]                           |
| $m_A$ [kg]                            | Anode mass                                                   | calculated; Equation (S11)       |
| $m_C$ [kg]                            | Cathode mass                                                 | calculated; Equation (S12)       |
| $m_E$ [kg]                            | Electrolyte mass                                             | calculated; Equation (S13)       |
| $m_{electrode}$ [kg m <sup>-2</sup> ] | Area density electrode coating                               | -                                |
| $m_S$ [kg]                            | Separator mass                                               | calculated; Equation (S14)       |
| $m_{stack}$ [kg]                      | Stack mass                                                   | calculated; Equation (S15)       |
| $n_A$ [-]                             | Number of anodes                                             | calculated; Equation (S7)        |
| $n_C$ [-]                             | Number of cathodes                                           | calculated; Equation (S6)        |
| $n_S$ [-]                             | Number of separators                                         | calculated; Equation (S8)        |
| $Q_{A,A}$ [Ah m <sup>-2</sup> ]       | Areal capacity anode                                         | 43.3-45.2 (experiment)           |
| $Q_{A,C}$ [Ah m <sup>-2</sup> ]       | Areal capacity cathode                                       | calculated; Equation (S4)        |
| $Q_{cell}$ [Ah]                       | Cell capacity                                                | >80                              |
| $Q_{spec,A}$ [Ah kg <sup>-1</sup> ]   | Specific capacity anode active material                      | 330 (experiment)                 |
| $Q_{spec,C}$ [Ah kg <sup>-1</sup> ]   | Specific capacity cathode active material                    | 172 (experiment)                 |
| $S_A$ [%]                             | Mass loss anode                                              | 9.7-11 (experiment)              |
| $S_C$ [%]                             | Mass loss cathode                                            | 0                                |
| $U_{cell}$ [V]                        | Nominal cell voltage                                         | 3.7 [1]                          |
| $\varepsilon_A$ [-]                   | Anode porosity                                               | 0.4 (calculated; Equation (S2))  |
| $\varepsilon_C$ [-]                   | Cathode porosity                                             | 0.35 (calculated; Equation (S2)) |
| $\varepsilon_S$ [-]                   | Separator porosity                                           | 0.55 [42]                        |
| $\theta_A$ [-]                        | Anode active material mass fraction                          | 0.93 (experiment)                |
| $\theta_C$ [-]                        | Cathode active material mass fraction                        | 0.92 (experiment)                |
| $\theta_n$ [-]                        | Individual mass fractions of the electrode coating materials | -                                |
| $\rho_{Al}$ [kg m <sup>-3</sup> ]     | Aluminium density                                            | 2700                             |
| $\rho_{Cu}$ [kg m <sup>-3</sup> ]     | Copper density                                               | 8920                             |
| $\rho_E$ [kg m <sup>-3</sup> ]        | Electrolyte density                                          | 1260 [8]                         |
| $\rho_n$ [kg m <sup>-3</sup> ]        | Individual densities of the electrode coating materials      | -                                |
| $\rho_{pmd,A}$ [kg m <sup>-3</sup> ]  | Anode particle mass density                                  | 2090 (calculated; Equation (S1)) |
| $\rho_{pmd,C}$ [kg m <sup>-3</sup> ]  | Cathode particle mass density                                | 4170 (calculated; Equation (S1)) |
| $\rho_S$ [kg m <sup>-3</sup> ]        | Separator material density                                   | 900                              |

$$\rho_{pmd} = \frac{1}{\sum_n \frac{\theta_n}{\rho_n}} \quad (S1)$$

$$\varepsilon = 1 - \frac{\frac{m_{electrode}}{d}}{\rho_{pmd}} \quad (S2)$$

$$d_A = \frac{Q_{A,A}}{\rho_{pmd,A} \cdot \theta_{Ac,A} \cdot Q_{spec,A} \cdot (1 - \epsilon_A) \cdot (1 - S_A)} \quad (S3)$$

$$Q_{A,C} = \frac{Q_{A,A}}{B} \quad (S4)$$

$$d_C = \frac{Q_{A,C}}{\rho_{pmd,C} \cdot \theta_{Ac,C} \cdot Q_{spec,C} \cdot (1 - \epsilon_C) \cdot (1 - S_C)} \quad (S5)$$

$$n_C = x \quad (S6)$$

$$n_A = n_C + 1 \quad (S7)$$

$$n_S = 2 \cdot n_A \quad (S8)$$

$$d_{stack} = n_C \cdot (d_{Al} + 2 \cdot d_C) + n_A \cdot (d_{Cu} + 2 \cdot d_A) + n_S \cdot d_S \quad (S9)$$

$$V_{stack} = A_A \cdot d_{stack} \quad (S10)$$

$$m_A = A_A \cdot n_A \cdot (d_{Cu} \cdot \rho_{Cu} + 2 \cdot d_A \cdot (1 - \epsilon_A) \cdot \rho_{pmd,A} \cdot (1 - S_A)) \quad (S11)$$

$$m_C = A_C \cdot n_C \cdot (d_{Al} \cdot \rho_{Al} + 2 \cdot d_C \cdot (1 - \epsilon_C) \cdot \rho_{pmd,C} \cdot (1 - S_C)) \quad (S12)$$

$$m_E = (n_S \cdot \epsilon_S \cdot A_S \cdot d_S + 2 \cdot n_A \cdot (d_A \cdot \epsilon_A \cdot A_A \cdot (1 - S_A) + d_A \cdot A_A \cdot S_A) + 2 \cdot n_C \cdot (d_C \cdot \epsilon_C \cdot A_C \cdot (1 - S_C) + d_C \cdot A_C \cdot S_C)) \cdot \rho_E \cdot F_E \quad (S13)$$

$$m_S = n_S \cdot A_S \cdot (1 - \epsilon_S) \cdot \rho_S \quad (S14)$$

$$m_{stack} = m_A + m_C + m_S + m_E \quad (S15)$$

$$Q_{cell} = 2 \cdot n_C \cdot A_C \cdot Q_{A,C} \quad (S16)$$

$$E_V = \frac{U_{cell} \cdot Q_{cell}}{V_{stack}} \quad (S17)$$

$$E_m = \frac{U_{cell} \cdot Q_{cell}}{m_{stack}} \quad (S18)$$

Generalized finite Warburg element Equation (S19) and the transformation into the transmission line model Equations (S20-S22) (imaginary unit  $i$ , angular frequency  $\omega$ , ionic resistance  $R_{Ion}$ , constant-phase capacitance  $Q_s$  and the constant phase exponent  $\alpha$ )

$$Z_{GFW} = R \cdot \frac{\coth((i \cdot T \cdot \omega)^P)}{(i \cdot T \cdot \omega)^P} \quad (S19)$$

$$R = R_{ion} \quad (S20)$$

$$T = (R_{ion} \cdot Q_s)^{\frac{1}{\alpha}} \quad (S21)$$

$$P = \frac{\alpha}{2} \quad (S22)$$
